# Supplementary material for: Laser-induced formation of “craters” and “hills” in azobenzene-containing polymethacrylate films
Source: Royal Society of Chemistry journal article supplement (doi:10.1039/d0sm00601g), 2020-01-01
Supplement: d0sm00601g1.pdf [file d0sm00601g1.pdf]

## Supporting information

### Laser-induced “craters” and “hills” formation in the azobenzene containing polymethacrylates films.

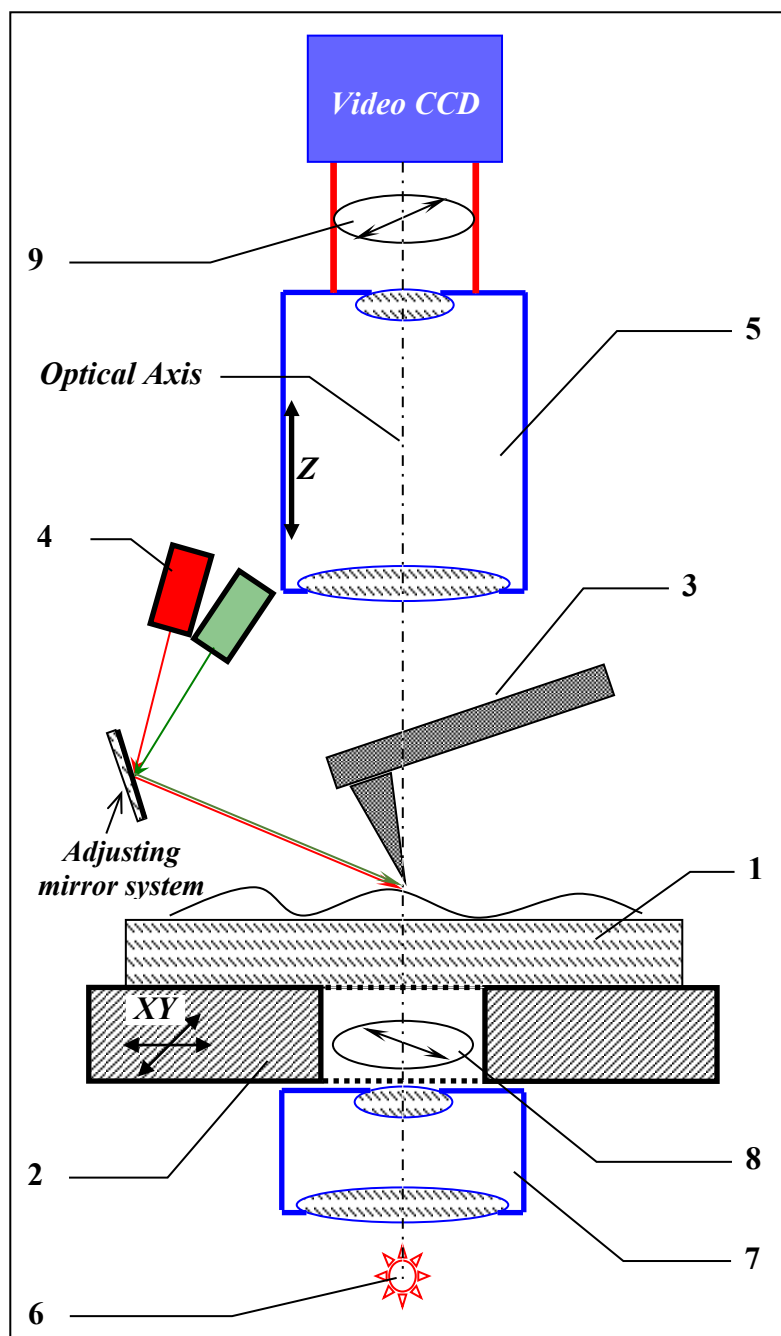

Scheme S1. Experimental setup used for simultaneous AFM and POM measurements. (For explanations, see the Experimental part.) 1 - sample; 2 - XY- piezostage; 3 - AFM-head; 4 - Green and red lasers; 5 - upright microscope; 6 - light source; 7 - condenser lens system; 8 - polarizer; 9 - analyzer.

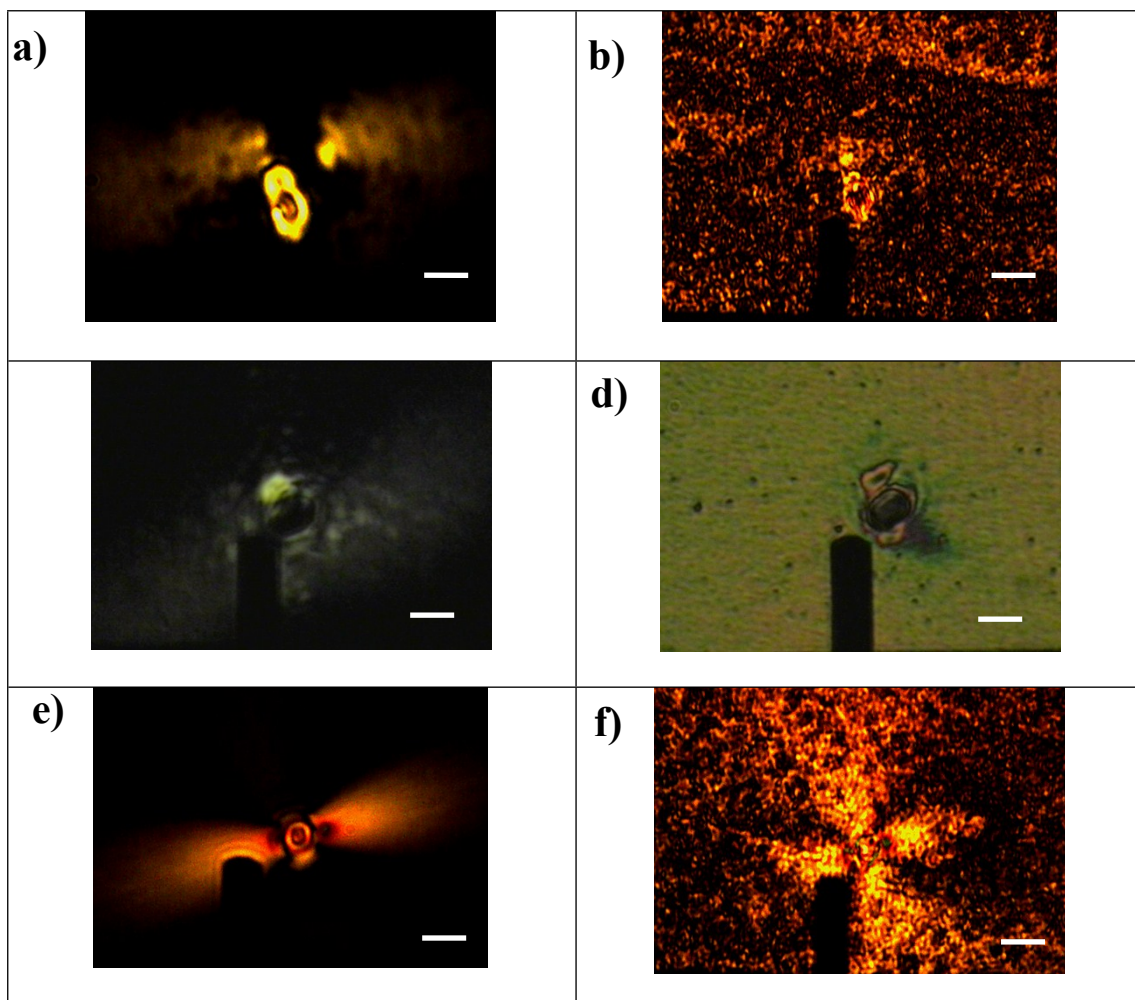

Fig. S1. POM image of the irradiated quenched (a) and annealed (b) films of **PMDA 6/10**; quenched (c) and annealed (d) films of **PMDA 10/6** (b); green laser, 532 nm ( $\sim 80 \mu\text{W}$ , 30 s). POM image quenched (e) and annealed (f) films of **PMDA 6/10** film after red laser action (633 nm,  $\sim 80 \mu\text{W}$ , 20 min). Scale bar is  $30 \mu\text{m}$ .

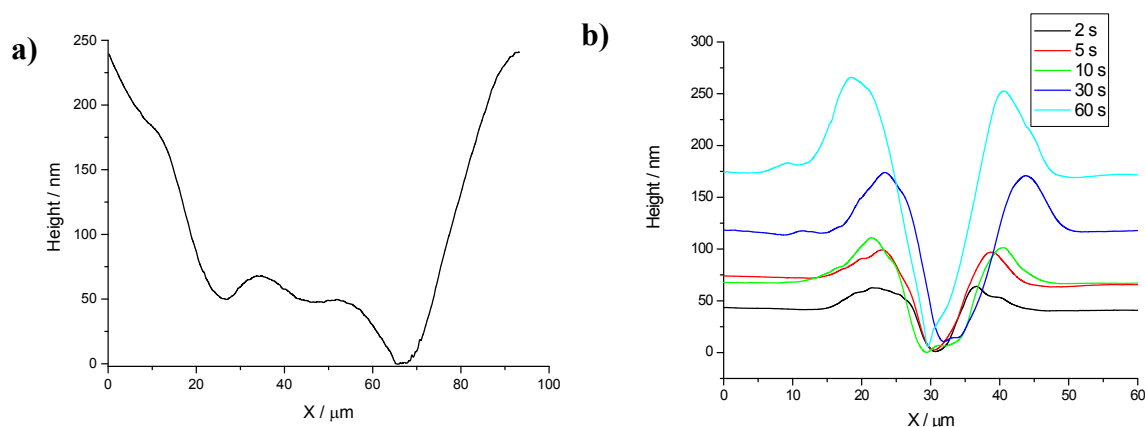

Fig. S2. Cross-sections in direction of light polarization of *quenched* **PMDA 6/10** film after green laser irradiation with low intensity ( $0.8 \mu\text{W}$ , 30 min) (a) and for *annealed* LC film of **PMDA 6/10** film irradiated by green laser ( $80 \mu\text{W}$ ) during different time (b).

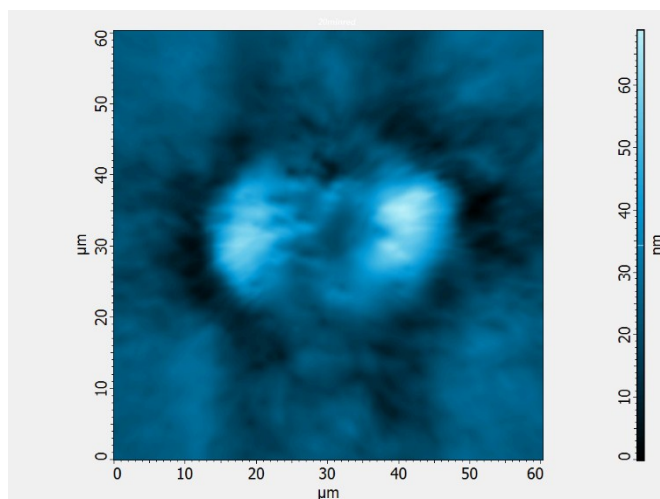

Fig. S3. AFM image of the *annealed* LC **PMDA 6/10** polymethacrylate film after 20 min of red laser (633 nm) irradiation ( $\sim 80 \mu\text{W}$ ).

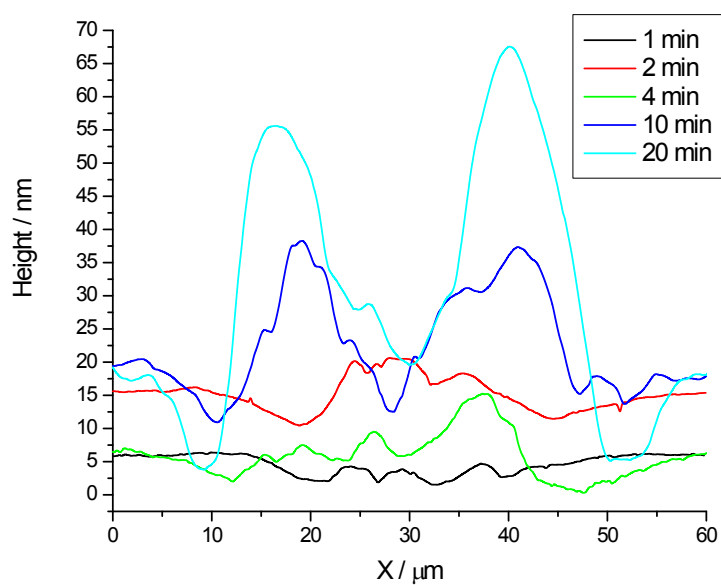

Fig. S4. Cross-sections in direction along polarization plane of *annealed* LC **PMDA 6/10** polymethacrylate film irradiated by red laser light.

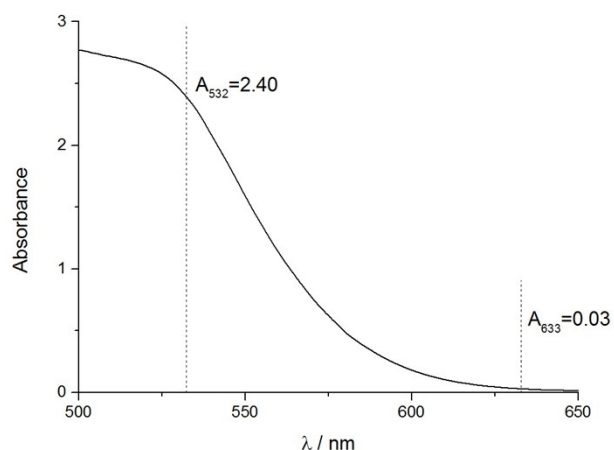

Fig. S5. Absorbance spectra of thick amorphousized film ( $\sim 20 \mu\text{m}$ ) of **PMDA 6/10** polymethacrylate in long-wavelength range.

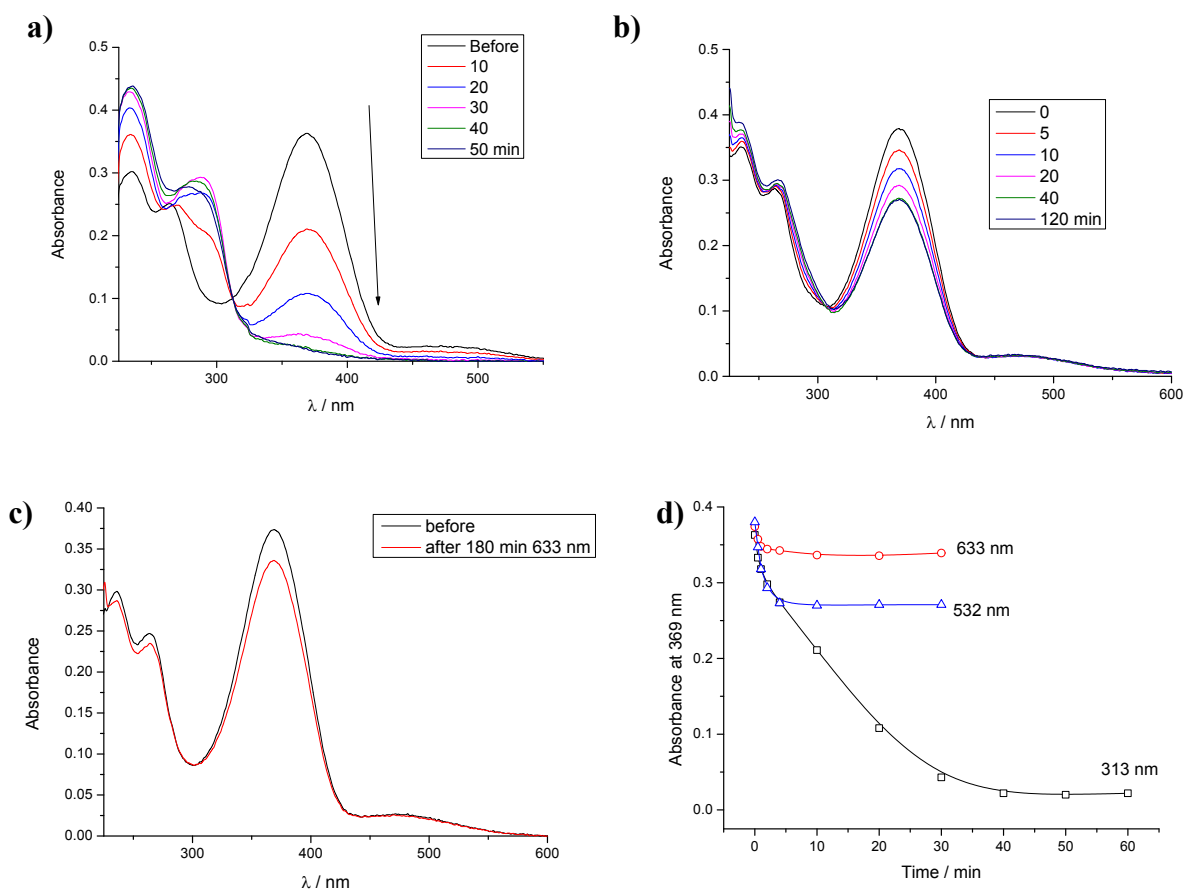

Fig. S6. Absorbance spectra changes under irradiation of the **PMDA 6/10** solution in dichloroethane ( $\sim 0.01 \text{ mg/mL}$ ) under light action with different wavelengths: 313 nm ( $1.8 \text{ mW/cm}^2$ ) (a), 532 nm ( $0.8 \text{ mW/cm}^2$ ) (b) and 633 nm ( $2.4 \text{ mW/cm}^2$ ) (c). (d) Kinetics of the absorbance decrease.

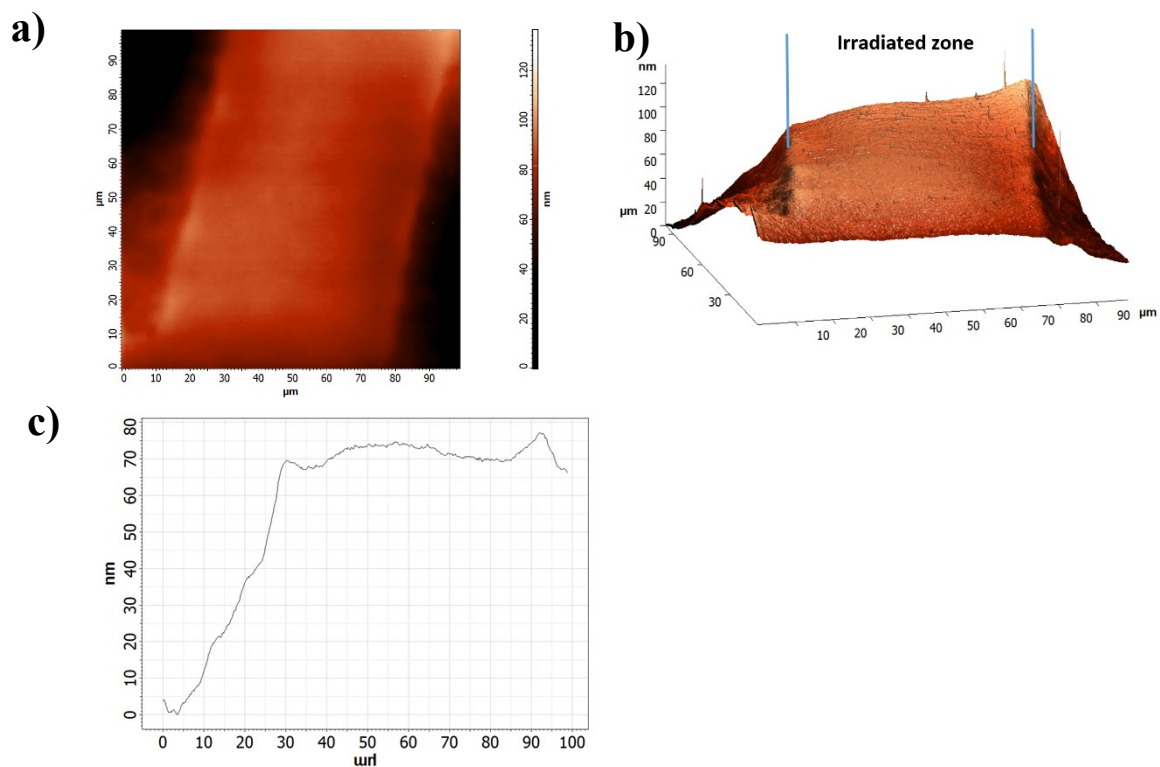

Fig. S7. (a) 2D and (b) 3D AFM scans of **PMDA 6/10** polymethacrylate film irradiated with UV-light (1 hour, 375 nm,  $\sim 5$  mW/cm<sup>2</sup>) through the mask followed by annealing at 40°C overnight. Line with width of 50  $\mu$ m corresponds to the irradiated zone. (c) Corresponding cross-section of the AFM scan in horizontal direction.
